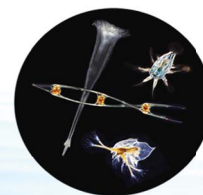

*J. Plankton Res.* (2020) 42(1): 31–39. First published online December 19, 2019 doi:10.1093/plankt/fbz069

## ORIGINAL ARTICLE

# Application of nuclear magnetic resonance for analyzing metabolic characteristics of winter diatom blooms

KWANG-SEUK JEONG<sup>1</sup>, KEON-YOUNG JEONG<sup>1,2</sup>, YOUNG-SHICK HONG<sup>3</sup>, DONG-KYUN KIM<sup>4</sup>, HYE-JI OH<sup>5</sup>  
AND KWANG-HYEON CHANG<sup>5,\*</sup>

<sup>1</sup>DEPARTMENT OF NURSING SCIENCE, SCHOOL OF PUBLIC HEALTH, DONGJU COLLEGE, BUSAN, SOUTH KOREA, <sup>2</sup>DEPARTMENT OF BIOLOGICAL SCIENCES, PUSAN NATIONAL UNIVERSITY, BUSAN, SOUTH KOREA, <sup>3</sup>DIVISION OF FOOD AND NUTRITION, CHONNAM NATIONAL UNIVERSITY, GWANGJU, SOUTH KOREA, <sup>4</sup>K-WATER RESEARCH INSTITUTE, DAEJEON, SOUTH KOREA, AND <sup>5</sup>DEPARTMENT OF ENVIRONMENTAL SCIENCE AND ENVIRONMENTAL ENGINEERING, KYUNG HEE UNIVERSITY, YONGIN, SOUTH KOREA

\*CORRESPONDING AUTHOR: chang38@khu.ac.kr

Received March 30, 2019; editorial decision November 27, 2019; accepted November 27, 2019

Corresponding editor: Beatrix E. Beisner

We compared two metabolome profiles of a small centric diatom species, *Stephanodiscus hantzschii* Grun., grown under conditions with enriched nutrients but different temperatures. This species proliferates in eutrophic rivers during winter. We investigated the population dynamics and internal metabolite changes of *Stephanodiscus* by performing a simple culture experiment at different temperatures (5 and 15°C). We applied the <sup>1</sup>H nuclear magnetic resonance (NMR) technique to fully grown cells to obtain the metabolite profiles of *S. hantzschii*. Growth rates were significantly different at different temperature conditions ( $0.99 \pm 0.11 \text{ day}^{-1}$  at 15°C and  $0.21 \pm 0.12 \text{ day}^{-1}$  at 5°C,  $n = 10$ ). Characterized metabolites included saturated and unsaturated fatty acids, AXP (including AMP, ADP and ATP), and UDP-glucose and UDP-galactose, all of which are important for energy metabolism. These metabolites were abundant within *S. hantzschii* cells grown at 15°C but were not prolific in those grown at 5°C. Furthermore, other <sup>1</sup>H NMR spectrum uncovered very little amounts of metabolites. Based on these observations of cell growth rate, although required nutrients were supplied, colder temperatures suppressed population growth through the deactivation of various internal metabolisms. Thus, winter proliferation of this species is opportunistic, implying that survival success led to dominance in freshwater ecosystems with neither resource competition nor grazing pressure.

**KEYWORDS:** *Stephanodiscus hantzschii* Grun; winter diatom blooms; nuclear magnetic resonance (NMR); metabolomics; cold stress

## INTRODUCTION

Microalgal proliferation in freshwater systems is recognized as the primary cause of water quality degradation and damage to aquatic ecosystems. Various environmental circumstances, such as temperature changes and nutrient accumulation, are associated with this phenomenon. To date, numerous studies have reported a causal relationship between environmental factors and bloom formation patterns from various species, including cyanobacteria such as *Microcystis* (Liu *et al.*, 2011) and *Oscillatoria* (Chu *et al.*, 2007) and the green algae *Chlorella* (Barati *et al.*, 2018). In contrast, due to numerous concerns related to the application of microalgal population dynamics, such as production of biofuels and environmental remediation, optimal conditions for their growth, including temperature, have become an important research topic (Smith and McBride, 2015; Hammed *et al.*, 2016).

Diatoms have been used as important bioindicators in oceanic and riverine ecosystems as their diversity reflects the environmental conditions. However, in recent years, their roles are expanding to biodiesel production and wastewater treatments (Li *et al.*, 2009; Datta *et al.*, 2019). In particular, the winter-growing diatom *Stephanodiscus hantzschii* has attracted much interest in freshwater systems compared with the summer-growing species. A series of ecological modeling and batch culture experiments have stressed the influence of diatom proliferation on water quality exacerbation in rivers such as increase of turbidity (Jeong *et al.*, 2007; Kim *et al.*, 2007b; Jung *et al.*, 2009; Jung *et al.*, 2011; Lenard and Ejankowski, 2017; Kim *et al.*, 2018), as well as its advantages, disadvantages and potential for environmental applications (Li *et al.*, 2009; Joh *et al.*, 2011; Yang *et al.*, 2012; Lang *et al.*, 2017).

The proliferation of microalgae occurs when the surrounding environment is favorable for the growth of these species. Several diatoms and green algal species replicate between 15 and 25°C, and their relative abundance typically increases in spring (Abdelaziz *et al.*, 2013; Abdelaziz *et al.*, 2014). Some studies have previously dealt with *S. hantzschii* in lentic systems within the Northern Hemisphere and found that this species usually appears in early spring (15–20°C) before domination by green algae. Lynn *et al.* (2000) successfully evaluated the growth pattern of *Stephanodiscus minutulus* from multifactorial experiments, indicating that it requires high phosphorus content under silica-limited conditions, resulting in a different phospholipid accumulation pattern at 20°C. However, in some river systems in East Asian, this diatom species proliferates during winter (i.e. typically between December and February), and its relative abundance represents more than 90% ( $>100\,000$  cells mL<sup>-1</sup>) of the total phytoplankton (Jeong *et al.*, 2007). However, although several

studies have been conducted on optimal conditions for the growth of *S. hantzschii*, physiological mechanisms that facilitate their growth at low temperatures remain poorly understood.

Metabolome analysis of microalgae via <sup>1</sup>H nuclear magnetic resonance (NMR) has been popularly implemented in recent years, and these studies have primarily focused on the overall metabolite profile analysis (Chauton *et al.*, 2003; Azizan *et al.*, 2018) or the comparison of lipid contents (Nuzzo *et al.*, 2013; Sarpal *et al.*, 2016). In the present study, we conducted a simple growth experiment to investigate the metabolic status of *S. hantzschii* using proton NMR spectroscopy to understand the accumulated metabolite profiles in *S. hantzschii* cells cultured under two different temperature conditions (i.e. 15 and 5°C). Based on statistical analyses applied to the NMR signals, we evaluated the adaptability of *S. hantzschii* to a cold temperature environment and phytoplankton–zooplankton interactions (Choi *et al.*, 2014; Choi *et al.*, 2016).

## MATERIALS AND METHOD

### Strain obtainment and growth assay

To investigate the response of the diatom *S. hantzschii* to low temperatures, we experimented on *S. hantzschii* based on a series of batch cultures. The diatom strain *S. hantzschii* Grunow was obtained from the Canadian Phylogenetic Culture Centre (strain number CPCC 267), and subcultures were maintained in diatom medium (DM; Beakes *et al.*, 1988) in a growth chamber (SDI-432C, Chemtopia, South Korea) at 15°C, with cold-white LED illumination (light intensity, 180 μM m<sup>-2</sup> s<sup>-1</sup>) with a 12 h light/12 h dark cycle.

We set two temperature conditions, 15°C as the control and 5°C as the tested treatment, and the remaining growth conditions were identical to the aforementioned subculture maintenance. The former temperature setting was selected according to the report from Jung *et al.* (2009) stating that this species grew well under temperature conditions of 15–17°C. A comparatively cold temperature (i.e. 5°C) was chosen based on a long-term ecological research at the lower Nakdong River, South Korea, where the recurrent winter proliferation of *S. hantzschii* has been reported at 4–7°C (Kim *et al.*, 2007a; Kim *et al.*, 2007b). Prior to the experiment, one subculture of the strain (grown at 15°C) was allowed to acclimatize to cold temperature conditions for three subculture generations. First, we inoculated approximately  $5 \times 10^6$  cells of *S. hantzschii* which were grown at 15°C, into a flask filled with a newly prepared DM, and the flask was incubated in the growth chamber (the temperature was set to 5°C). We

allowed the subculture to grow in the cold temperature, and the two inoculations were implemented using cells adapted to 5°C temperature in the same way.

Each experimental group encompassed 10 biological replicates. We used 300-mL Erlenmeyer flasks filled with 150-mL DM stocks for the replicates. When both 15 and 5°C acclimated cultures were ready to undergo the growth experiments, we measured the cell density of the cultures and inoculated cells into newly prepared fresh DM (initial density, 10 000 cells mL<sup>-1</sup>), respectively, resulting in 10 replicate flasks for 15°C growth and another 10 flasks for 5°C growth. The flasks were then placed in two different growth chambers, set at either 15 or 5°C.

The cultures were allowed to proliferate for 14 days. During this growth experiment, we subsampled 2-mL culture medium containing diatom cells from each flask at daily intervals, which were then stored in polypropylene tubes, and 0.2-mL Lugol's solution was added to every tube to preserve the cells for further density measurements. We used Sedgewick-Rafter counting chamber for cell enumeration. We injected 1 mL of well suspended samples into the chamber and allowed the cells to settle down (~2 h). Cell numbers were measured under a Nikon inverted microscope (Diaphot, Nikon, Japan). We calculated the maximum growth rate by using the equation shown below (Equation 1):

$$\mu_{\max} = \ln((x_2/x_1) / (t_2 - t_1)),$$

where  $x_2$  and  $x_1$  are the densities of *S. hantzschii* (cells mL<sup>-1</sup>) at culture times  $t_2$  and  $t_1$  days, respectively.

On the 14th day, we enumerated the number of *S. hantzschii* cells of each culture flask immediately, in order to determine the threshold of cell amount for NMR analysis. This was also to avoid cell condensation effect (i.e. larger cell amount would result in stronger NMR signal production). Based on the culture sample that exhibited the smallest cell amount, we set the threshold as  $12 \times 10^6$  cells per flask. We used most of the volume of the 5°C flasks to meet the threshold, while more or less than 18–20 mL of 15°C flasks were used. We gently but sufficiently shook the flasks to mix the cells in every flask and then carefully sampled and transferred the cells into new polypropylene tubes for centrifugation at 4000 rpm for 5 min. The supernatant was carefully eliminated and discarded, and cell pellets were transferred to sterile 1.5-mL centrifugation tubes. The harvested *S. hantzschii* cells were washed thrice with sterile Dulbecco's phosphate buffered saline. The tubes were then immediately flash-frozen with liquid nitrogen and stored at -80°C (Forma -86C Ultra Low Temperature Freezer, Thermo Fisher Scientific, Columbus, OH, USA) until the next required sample process.

## Metabolome analysis using cultured *S. hantzschii*

The pelleted frozen cells were thawed and resuspended in a mixture of 700 µL of 70% methanol-*d*<sub>4</sub> and 30% deuterium oxide (D<sub>2</sub>O) with 1-mM sodium 3-trimethylsilyl [2,2,3,3-<sup>2</sup>H<sub>4</sub>]-1-propionate (TSP). Metabolites were extracted by vortexing the mixture at 2.10 m s<sup>-1</sup>, 0.30 cycle time, with three cycles and 0.05 pause dwell using a Mini Bead Ruptor 24 (Omni International, Kennesaw, GA, USA).

Subsequently, 550 µL of the supernatant were transferred to an NMR tube. The chemical shift reference compound TSP used in the NMR experiment (see previous section) and D<sub>2</sub>O provided a field lock for the NMR spectrometer. The 1D <sup>1</sup>H NMR spectra of cell extracts were acquired using a Bruker 700-MHz spectrometer equipped with a cryogenic triple-resonance probe and an automatic sample changer (Bruker Biospin, Rheinstetten, Germany) operating at a frequency of 700.40 MHz <sup>1</sup>H and a temperature of 300 K. The “zgpg30” pulse sequence was used to suppress the water signal and acquire the 1D <sup>1</sup>H NMR spectrum. For each sample, 128 transients were collected into 32 K data points using a spectrum at 8403.36 Hz with a relaxation delay of 2.0 s. A line-broadening function of 0.3 Hz was applied to all spectra before Fourier transformation. Both phase and baseline of the resultant NMR spectra were manually corrected, and the chemical shift was calibrated to δ 0.00 to the signal from the TSP with the phosphate buffer. Signal assignment of representative sample was facilitated by 2D total correlation spectroscopy (TOCSY) and heteronuclear single-quantum correlation (HSQC). Statistical total correlation spectroscopy (STOCSY) method (Cloarec *et al.*, 2005) was also used to identify the metabolite.

The 1D <sup>1</sup>H NMR spectra were imported into MATLAB (R2010b, Mathworks, Inc., 2010) without binning or spectral segments, using an in-house software afterward. Then, the probabilistic quotient normalization of spectra using the mean spectrum was conducted to estimate the most probabilistic quotient after total integral normalization for avoiding the dilution effects of the samples and the effects of metabolites in massive amounts on changes in the overall concentration of samples (Dieterle *et al.*, 2006), after the removal of the region corresponding to residual water (δ 4.57–4.90) and methanol (δ 3.36–3.42). The resultant data were analyzed using multivariate statistical models, such as principal component analysis (PCA), partial least-squares discriminant analysis (PLS-DA) and orthogonal projections to the latent structures discriminant analysis (OPLS-DA; Hotelling, 1992; Johan and Svante, 2002; Bylesjö *et al.*, 2006). In addition, the

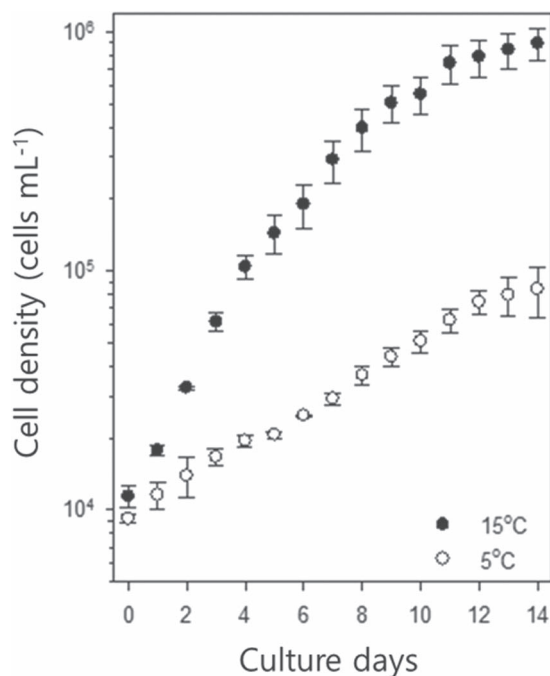

**Fig. 1.** Growth curves of *S. hantzschii* in two different temperature conditions (control, 15°C; experimental, 5°C). Error bars indicate standard errors ( $n = 10$  per experimental group).

OPLS loading coefficient or OPLS loading plots in the OPLS-DA models between the two classes were back-scaled to improve interpretability and identify discriminant metabolites, as described by Cloarec *et al.* (2005). To prevent the over-fitting of spectra data into the OPLS-DA models, a 7-fold cross-validation method was used, and the cross-validation parameter  $Q^2$ , which is defined as the proportion of variance in the data predictable by the model and indicates the predictability, was calculated.

## RESULTS

### Growth of *S. hantzschii*

The growth of *S. hantzschii* differed between the two temperature regimes (Fig. 1), and cell density readily increased at 15°C. In contrast, although low-temperature-acclimated cells were used, the population of *S. hantzschii* only gradually increased at 5°C, and its growth rate was substantially lower at 5°C than at 15°C (control group). The average maximum growth rate ( $\mu_{\max}$ ) of the control group was  $0.99 \pm 0.11 \text{ day}^{-1}$ , whereas that of the low-temperature group was  $0.21 \pm 0.12 \text{ day}^{-1}$  ( $n = 10$ ). In case of the control group, a sharp increase in the cell density was observed on day 2 of culture, and the population reached a stable plateau after day 10. The low-temperature group

did not show this proliferation pattern, and they reached plateau on day 12.

### Metabolome analysis

The representative  $^1\text{H}$  NMR spectra of the *S. hantzschii* extract are shown in Fig. 2. The assigned metabolites comprised both saturated fatty acids (SFAs) and unsaturated fatty acids, alanine, acetate, succinate, choline, lactate, threonine, xylose, glucose, UDP-glucose and UDP-galactose, with the dominant metabolites being SFAs and unsaturated fatty acids (Fig. 2a). The application of PCA to the  $^1\text{H}$  NMR spectrum data of *S. hantzschii* exhibited clear metabolic differentiations in the species subcultures cultivated at 5°C from those cultivated at 15°C (Fig. 2b), which was accounted by PC1 (0.595), PC2 (0.209) and PC3 (0.071).

We generated an OPLS-DA model from the  $^1\text{H}$  NMR spectra of *S. hantzschii* cells to identify intracellular metabolites responsible for the differentiation. This OPLS model was generated with one predictive component and one orthogonal component and validated by a 200 times permutation test in the PLS-DA model with the same number of components (data not shown). The model showed good fitness and high predictability, as indicated by  $R^2X = 0.66$  and  $Q^2 = 0.93$ , respectively.

The upper segment in the OPLS coefficient plot (Fig. 3) denotes high metabolite levels within *S. hantzschii* grown at 15°C compared with those grown at 5°C, whereas the lower segment reveals decreased metabolite levels in *S. hantzschii* grown at 15°C. As shown in Fig. 3, *S. hantzschii* cells cultivated at 15°C had higher levels of SFAs, choline, UDP-glucose, UDP-galactose and AXP (a collective indication of AMP, ADP and ATP) than those grown at 5°C (Fig. 3b and c).

Metabolite levels between the cells grown at 5°C and those grown at 15°C are compared in Fig. 4. In all cases, *S. hantzschii* produced more metabolites at 15°C than at 5°C.

## DISCUSSION

### Metabolite patterns

In this study, we considered that NMR analysis allows us to understand the biochemical response pattern of microalgal species to different environmental conditions. Although some chemicals are still not assigned clearly, the well-assigned metabolites provided useful information to characterize the *S. hantzschii* response strategy to low temperature stress. Based on the results, we believe that *S. hantzschii* just maintained their population size in 5°C in contrast to 15°C treatment where the species actively grew.



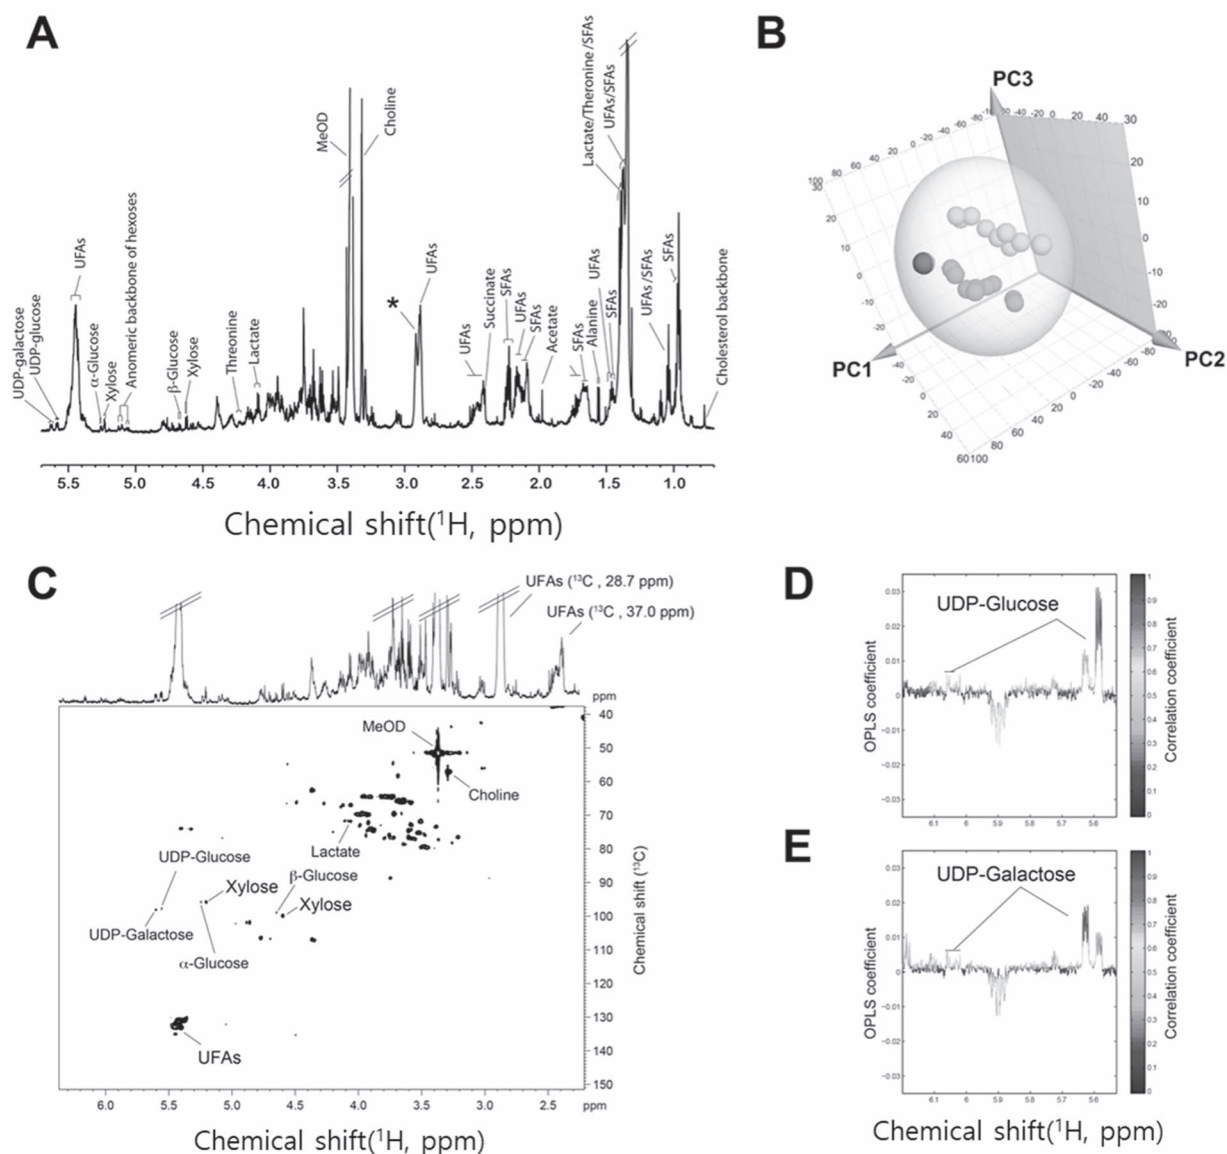

**Fig. 2.** Metabolite profile of *S. hantzschii* subcultures from two different temperature groups, and experimental group differentiation. **(A)** Representative 700 MHz  $^1\text{H}$  NMR spectrum of the species extracts. **(B)** 3D PCA score plot derived from  $^1\text{H}$  NMR spectra (green,  $5^\circ\text{C}$ ; blue,  $15^\circ\text{C}$ ). **(C)** HSQC NMR spectrum with identification of the metabolite selected. Partial regions of STOCYSY of **(D)** UDP-glucose and **(E)** UDP-galactose.

Overall, the low production level of SFA, AXP, UDP-glucose and UDP-galactose in  $5^\circ\text{C}$  treatment would be due to the inefficiency of photosynthesis in *S. hantzschii* cells. Photosynthesis is a system that automatically transports electron to generate energy storage products in the presence of light. Generally, microalgae exhibit the highest photosynthetic rates under optimum growth temperature; the lower the growth temperature is, the lower the photosynthetic rates are found (Claquin *et al.*, 2008). It is known that low temperature stress increases the membrane viscosity of cellular organelles in chloroplasts

(e.g. thylakoid) and lowers the activity of carbon, nitrogen or sulfate reduction enzymes, which leads to the inhibition of the electron transport process (Huner *et al.*, 1998; Ensminger *et al.*, 2006). Under autotrophic conditions, microalgae yields ATP ( $\sim 40\%$ ) from oxidative phosphorylation process in the mitochondria, and the majority of ATP is consumed in Calvin cycle (Yang *et al.*, 2000). Unfortunately we did not measure photosynthetic rates in this study, the significant decrease of AXP in  $5^\circ\text{C}$  treatment would be due to the low photosynthetic activity resulting in low growth rates of *S. hantzschii*.

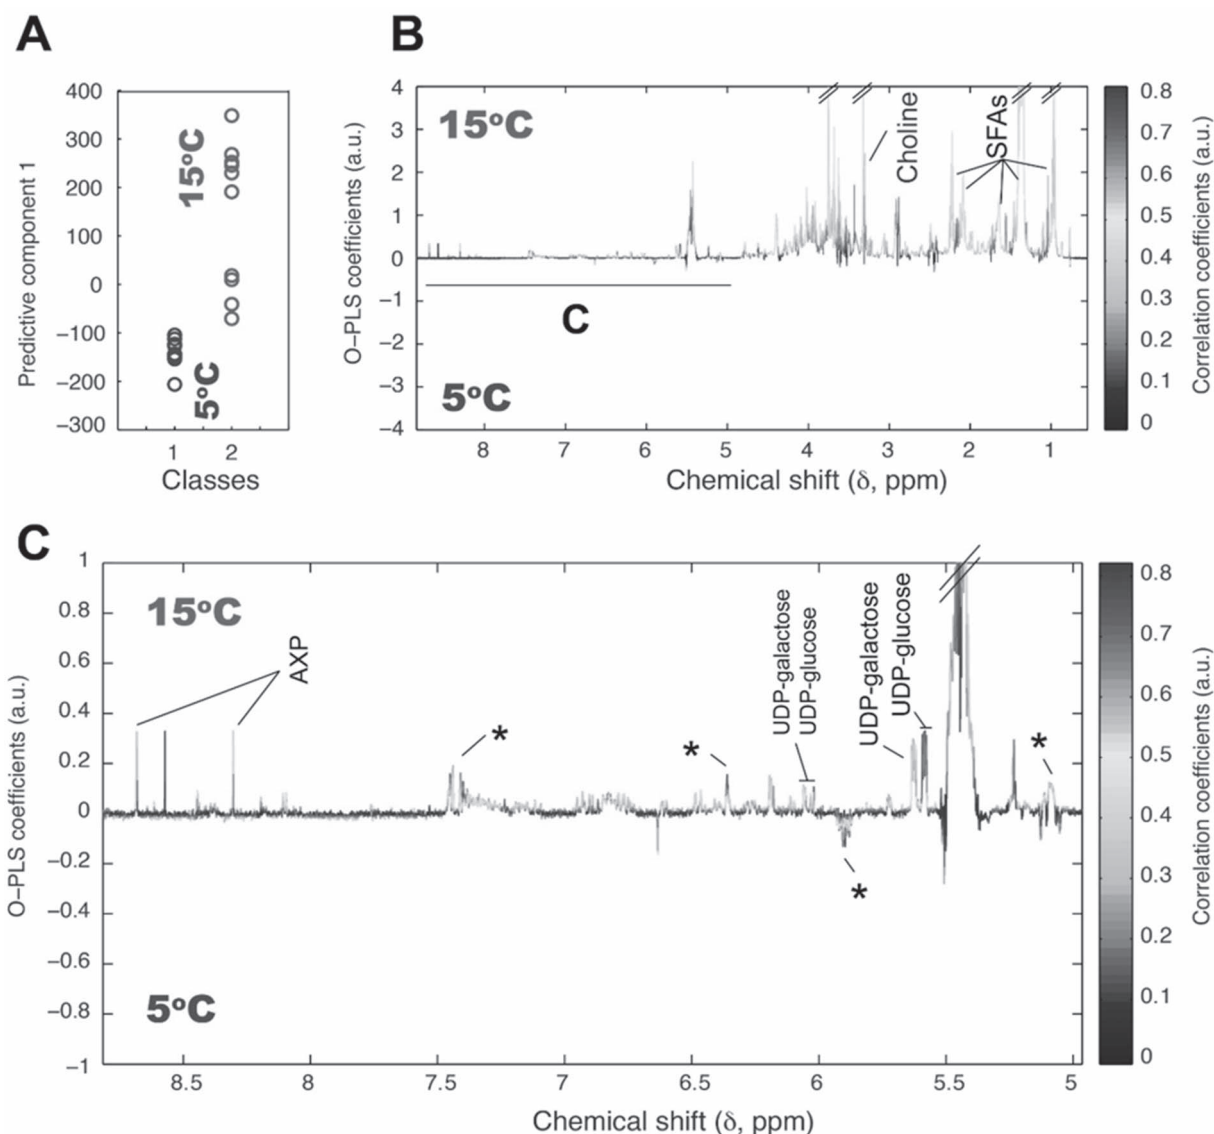

**Fig. 3.** (A) OPLS score and (B) coefficient plots derived from  $^1\text{H}$  NMR spectra of *S. hantzschii* extract, revealing a clear metabolic differentiation between *S. hantzschii* grown under different temperatures of 5 and 15°C, and the identification of *S. hantzschii* metabolites distinctly depends on different growing conditions. Panel (C) is the expansion selected at (C) indicated in (B). Asterisks indicate unknown metabolites. AXP denotes AMP, ADP and ATP.

SFA, UDP-glucose and UDP-galactose contents showed a similar pattern to AXP. Relatively higher contents of SFA were observed in 15°C treatment. In their extensive review, Paliwal *et al.* (2017) insisted that relatively higher temperature allowed microalgae to accumulate non-polar lipids such as triacyl glycerol under sufficient light conditions. We believe that a relatively high photosynthetic rate would make *S. hantzschii* obtain carbon source to generate a large quantity of SFA, but the species would suffer from lack of carbon accumulation at

lower temperature, resulting in low SFA contents. UDP-glucose and UDP-galactose are intermittent metabolites that are used to form Chrysolaminaran (although not shown in this study), a storage carbohydrate that is found in Bascillariophyta (Zhu *et al.*, 2015; Zill *et al.*, 2017). It is not apparent whether the increase of UDP-glucose and UDP-galactose 15°C treatment is from the degradation or generation of Chrysolaminaran, the relatively highly activated metabolic process in this higher temperature treatment would allow the increase of these metabolites.

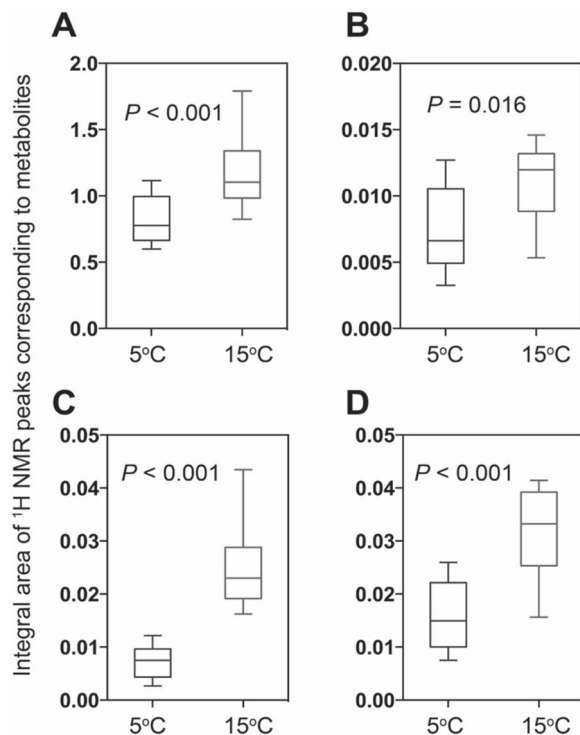

**Fig. 4.** Relative amounts of metabolites showing a distinct difference between groups grown at differing temperatures, which were calculated from integral areas of  $^1\text{H}$  NMR peaks of individual metabolites. (A) SFAs. (B) AXP. (C) UDP-glucose. (D) UDP-galactose.

### *S. hantzschii* increase would not be active result

Understanding the interactions between microalgal populations and environmental factors is important not only for the management of water quality but also for the control of algal biomass in cultures of biomass energy and biofloc ponds (Du *et al.*, 2018). Various environmental factors, including temperature and nutrient conditions, affect the growth patterns of microalgae, and increased proliferation of microalgae occurs under favorable environmental conditions (Pohnert, 2005; Kim *et al.*, 2006; Kim *et al.*, 2008; Paerl *et al.*, 2011). In the Northern Hemisphere, an increase in the water temperature in eutrophic waters occurs during spring, usually between 15 and 20°C, and triggers the fast growth of diatoms, followed by the proliferation of green algae (Mechling and Kilham, 1982; Lynn *et al.*, 2000; Reynolds, 2006) or cyanobacteria (Paerl *et al.*, 2001; Paerl and Paul, 2012). Thus, winter density increase of diatoms is an extraordinary phenomenon that attracts both ecological and physiological interests.

To date, it is known that diatoms are relatively insensitive to temperature than are other microalgae (Anderson, 2000); thus, it is expected that some diatom species have the potential to dominate a winter microalgal assemblage

(Løvstad, 1984; Ellen and Soltau, 1990; Kim *et al.*, 2008; Jung *et al.*, 2009). Based on our results, however, the increase of *S. hantzschii* density in freshwater systems in winter would not be an active proliferation but a result of slow adaptation and maintenance of population to cold water temperature. Long-term weekly monitoring and modeling studies showed that, unlike other excessively grown microalgae or cyanobacteria, *S. hantzschii* usually required more than 2 or 3 weeks to form large population size in winter (December to next January; Jeong *et al.*, 2007; Kim *et al.*, 2007b). Cold adaptation of microalgae has been under steadily increasing interest (Smith *et al.*, 1994; Thomas and Dieckmann, 2002; Svenning *et al.*, 2019), which might be due to the extensive overexpression of cold adaptation genes, including heat- and cold-shock proteins (e.g. Thomas and Klaus, 2004). Further transcriptomic analysis for *S. hantzschii* is requested to make clear this hypothesis.

## CONCLUSION

In this study, we observed that the small centric diatom *S. hantzschii* could survive in cold temperature conditions (5°C), but the growth pattern was different from the control group (15°C). The comparison of the metabolite profile obtained from NMR analysis revealed that cold temperature stress affected the metabolism activation negatively. Some biochemical metabolite contents, including AXP and SFA, were significantly lower in the cold treatment samples compared with the control group. Although the species grew slowly in the 5°C condition, based on the metabolite profile pattern, the growth would be concluded as survival. Further transcriptomic analytic studies should be conducted to identify how the species adapted to the temperature stress.

## FUNDING

This study was financially supported by the research project "Prediction and elucidation of diatom proliferation in freshwater systems using molecular ecological models based on transcriptome/metabolome and artificial intelligence" from the National Research Foundation of South Korea (Project No. 2019019984).

## REFERENCES

- Abdelaziz, A. E. M., Leite, G. B., Belhaj, M. A. and Hallenbeck, P. C. (2014) Screening microalgae native to Quebec for wastewater treatment and biodiesel production. *Bioresour. Technol.*, **157**, 140–148.
- Abdelaziz, A. E. M., Leite, G. B. and Hallenbeck, P. C. (2013) Addressing the challenges for sustainable production of algal biofuels: II. Harvesting and conversion to biofuels. *Environ. Technol.*, **34**, 1807–1836.

- Anderson, N. J. (2000) Miniview: diatoms, temperature and climatic change. *Eur. J. Phycol.*, **35**, 307–314.
- Azizan, A., Bustamam, M. S. A., Maulidiani, M., Shaari, K., Ismail, I. S., Nagao, N. and Abas, F. (2018) Metabolite profiling of the microalgal diatom *Chaetoceros Calcitrans* and correlation with antioxidant and nitric oxide inhibitory activities via  $^1\text{H}$  NMR-based metabolomics. *Mar. Drugs*, **16**, 154.
- Barati, B., Lim, P. E., Gan, S. Y., Poong, S. W., Phang, S. M. and Beardall, J. (2018) Effect of elevated temperature on the physiological responses of marine chlorella strains from different latitudes. *J. Appl. Phycol.*, **30**, 1–13.
- Beakes, G. W., Canter, H. M. and Jaworski, G. H. M. (1988) Zoospore ultrastructure of *Zygorhizidium affluens* and *Z. planktonicum*, two chytrids parasitizing the diatom *Asterionella formosa*. *Can. J. Bot.*, **66**, 1054–1067.
- Bylesjö, M., Rantalainen, M. K., Cloarec, O., Nicholson, J. K., Holmes, E. and Tryg, J. (2006) OPLS discriminant analysis: combining the strengths of PLS-DA and SIMCA classification. *J. Chemom.*, **20**, 341–351.
- Chauton, M. S., Størseth, T. R. and Johnsen, G. (2003) High-resolution magic angle spinning  $^1\text{H}$  NMR analysis of whole cells of *Thalassiosira pseudonana* (Bacillariophyceae): broad range analysis of metabolic composition and nutritional value. *J. Appl. Phycol.*, **15**, 533–542.
- Choi, J. Y., Kim, S. K., Chang, K. H., Kim, M. C., La, G. H., Joo, G. J., and Jeong, K. S. (2014) Population growth of the cladoceran, *Daphnia magna*: a quantitative analysis of the effects of different algal food. *PLoS ONE*, **9**, e95591.
- Choi, J. Y., Kim, S. K., La, G. H., Chang, K. H., Kim, D. K., Jeong, K. Y., Park, M. S., Joo, G. J., Kim, H. W. and Jeong, K. S. (2016) Effects of algal food quality on sexual reproduction of *Daphnia magna*. *Evol.*, **6**, 2817–2832.
- Chu, Z., Jin, X., Iwami, N. and Inamori, Y. (2007) The effect of temperature on growth characteristics and competitions of *Microcystis aeruginosa* and *Oscillatoria mougeotii* in a shallow, eutrophic lake simulator system. *Hydrobiologia*, **581**, 217–223.
- Claquin, P., Probert, I., Lefebvre, S. and Veron, B. (2008) Effects of temperature on photosynthetic parameters and TEP production in eight species of marine microalgae. *Aquat. Microb. Ecol.*, **51**, 1–11.
- Cloarec, O., Dumas, M. E., Trygg, J., Graig, A., Barton, R. H., Lindon, J. C., Nicholson, J. K. and Holmes, E. (2005) Evaluation of the orthogonal projection on latent structure model limitations caused by chemical shift variability and improved visualization of biomarker changes in  $^1\text{H}$  NMR spectroscopic metabonomic studies. *Anal. Chem.*, **77**, 517–526.
- Datta, A., Marella, T. K., Tiwari, A. and Wani, S. P. (2019) The diatoms: from eutrophic indicators to mitigators. In Gupta, S. and Bux, F. (eds.), *Application of Microalgae in Wastewater Treatment*, Springer, Cham, pp. 19–40.
- Dieterle, F., Ross, A., Schlotterbeck, G. and Senn, H. (2006) Probabilistic quotient normalization as robust method to account for dilution of complex biological mixtures. Application in  $^1\text{H}$  NMR Metabolomics. *Anal. Chem.*, **78**, 4281–4290.
- Du, Z. Y., Alvaro, J., Hyden, B., Zienkiewicz, K., Benning, N., Zienkiewicz, A., Bonito, G. and Benning, C. (2018) Enhancing oil production and harvest by combining the marine alga *Nannochloropsis oceanica* and the oleaginous fungus *Mortierella elongate*. *Biotechnol. Biofuels*, **11**, 174.
- Ellen, D. and Soltau, K. S. (1990) Temperature effects on silicon- and phosphorus-limited growth and competitive interactions among three diatoms. *J. Phycol.*, **26**, 40–50.
- Ensminger, I., Busch, F. and Huner, N. P. A. (2006) Photostasis and cold acclimation: sensing low temperature through photosynthesis. *Physiol. Plant.*, **126**, 28–44.
- Hammed, A. M., Prajapati, S. K., Simsek, S. and Simsek, H. (2016) Growth regime and environmental remediation of microalgae. *Algae*, **31**, 189–204.
- Hotelling, H. (1992) The generalization of student's ratio. In Kotz, S. and Johnson, N. L. (eds.), *Breakthroughs in Statistics: Foundations and Basic Theory*, Springer, New York, pp. 54–65.
- Huner, N. P. A., Öquist, G. and Sarhan, F. (1998) Energy balance and acclimation to light and cold. *Trends Plant Sci.*, **3**, 224–230.
- Jeong, K. S., Kim, D. K. and Joo, G. J. (2007) Delayed influence of dam storage and discharge on the determination of seasonal proliferations of *Microcystis aeruginosa* and *Stephanodiscus hantzschii* in a regulated river system of the lower Nakdong River (South Korea). *Water Res.*, **41**, 1269–1279.
- Joh, G., Choi, Y. S., Shin, J. K. and Lee, J. (2011) Problematic algae in the sedimentation and filtration process of water treatment plants. *J. Water Supply Res. T.*, **60**, 219–230.
- Johan, T. and Svante, W. (2002) Orthogonal projections to latent structures (O-PLS). *J. Chemom.*, **16**, 119–128.
- Jung, S. W., Kwon, O. Y., Lee, J. H. and Han, M. S. (2009) Effects of water temperature and silicate on the winter blooming diatom *Stephanodiscus hantzschii* (Bacillariophyceae) growing in eutrophic conditions in the lower Han River, South Korea. *J. Freshw. Ecol.*, **24**, 219–226.
- Jung, S. W., Joo, H. M., Kim, Y. O., Lee, J. H. and Han, M. S. (2011) Effects of temperature and nutrient depletion and reintroduction on growth of *Stephanodiscus hantzschii* (Bacillariophyceae): implications for the blooming mechanism. *J. Freshw. Ecol.*, **26**, 115–121.
- Kim, D. K., Chang, K. H., Joo, G. J., Jeong, K. S. and Kim, H. W. (2006) Patterning zooplankton dynamics in the regulated Nakdong River by means of the self-organizing map. *Korean. J. Limnol.*, **39**, 52–61.
- Kim, D. K., Gao, H., Jeong, K. S., Recknagel, F. and Joo, G. J. (2007a) Predictive function and rules for population dynamics of *Microcystis aeruginosa* in the regulated Nakdong River (South Korea), discovered by evolutionary algorithms. *Ecol. Model.*, **203**, 147–156.
- Kim, D. K., Jeong, K. S., Whigham, P. A. and Joo, G. J. (2007b) Winter diatom blooms in a regulated river in South Korea: explanations based on evolutionary computation. *Freshw. Biol.*, **52**, 2021–2041.
- Kim, J. S., Seo, I. W., Lyu, S. and Kwak, S. (2018) Modeling water temperature effect in diatom (*Stephanodiscus hantzschii*) prediction in eutrophic rivers using a 2D contaminant transport model. *J. Hydro-Environ. Res.*, **19**, 41–55.
- Kim, M. C., La, G. H., Kim, H. W., Jeong, K. S., Kim, D. K. and Joo, G. J. (2008) The effect of water temperature on proliferation of *Stephanodiscus* sp. in vitro from the Nakdong River, South Korea. *Korean J. Limnol.*, **41**, 26–33.
- Lang, Y., del Monte, F. and Dockery, P. (2017) The multiple roles of diatoms in environmental applications: prospects for sol-gel modified diatoms. In Pillai, S. and Hehir, S. (eds.), *Sol-Gel Materials for Energy, Environment and Electronic Applications. Advances in Sol-Gel Derived Materials and Technologies*, Springer, Cham, pp. 101–120.
- Lenard, T. and Ejankowski, W. (2017) Natural water brownification as a shift in the phytoplankton community in a deep hard water lake. *Hydrobiologia*, **787**, 153–166.
- Li, R., Chen, G. Z., Tam, N. F. Y., Luan, T. G., Shin, P. K. S., Gheung, S. G. and Liu, Y. (2009) Toxicity of bisphenol a and its bioaccumulation



- and removal by a marine microalgae *Stephanodiscus hantzschii*. *Ecotoxicol. Environ. Saf.*, **72**, 321–328.
- Liu, X., Lu, X. and Chen, Y. (2011) The effects of temperature and nutrient ratios on *Microcystis* blooms in Lake Taihu, China: an 11-year investigation. *Harmful Algae*, **10**, 337–343.
- Løvstad, Ø. (1984) Growth limiting factors for *Oscillatoria* spp. and two diatoms at low temperatures in eutrophic lakes. *Oikos*, **43**, 358–362.
- Lynn, S. G., Kilham, S. S., Kreeger, D. A. and Interlandi, S. J. (2000) Effect of nutrient availability on the biochemical and elemental stoichiometry in the freshwater diatom *Stephanodiscus minutulus* (Bacillariophyceae). *J. Phycol.*, **36**, 510–522.
- Mechling, J. A. and Kilham, S. S. (1982) Temperature effects on silicon limited growth of the Lake Michigan diatom *Stephanodiscus minutulus* (Bacillariophyceae). *J. Phycol.*, **18**, 199–205.
- Nuzzo, G., Gallo, C., D'Ippolito, G., Cutignano, A., Sardo, A. and Fontana, A. (2013) Composition and quantitation of microalgal lipids by ERETIC 1H NMR method. *Mar. Drugs*, **11**, 3742.
- Paerl, H. W., Fulton, R. S., Moisaner, P. H. and Dyble, J. (2001) Harmful freshwater algal blooms, with an emphasis on cyanobacteria. *Sci. World J.*, **1**, 76–113.
- Paerl, H. W., Hall, N. S. and Calandrino, E. S. (2011) Controlling harmful cyanobacterial blooms in a world experiencing anthropogenic and climatic-induced change. *Sci. Total Environ.*, **409**, 1739–1745.
- Paerl, H. W. and Paul, V. J. (2012) Climate change: links to global expansion of harmful cyanobacteria. *Water Res.*, **46**, 1349–1363.
- Paliwal, C., Mitra, M., Bhayani, B., Bharadwaj, S. V. V., Ghosh, T., Dubey, S. and Mishra, S. (2017) Abiotic stresses as tools for metabolites in microalgae. *Bioresour. Technol.*, **244**, 1216–1226.
- Pohnert, G. (2005) Diatom/copepod interactions in plankton: the indirect chemical defense of unicellular algae. *Chem Bio Chem*, **6**, 946–959.
- Reynolds, C. S. (2006) *The Ecology of Phytoplankton*, Cambridge University Press, Cambridge.
- Sarpal, A. S., Teixeira, C., Silva, P. R. M., Monteiro, T. V. D., da Silva, J. I., da Cunha, V. S. and Daroda, R. J. (2016) NMR techniques for determination of lipid content in microalgal biomass and their use in monitoring the cultivation with biodiesel potential. *Appl. Microbiol. Biotechnol.*, **100**, 2471–2485.
- Smith, R. E. H., Stapleford, L. C. and Ridings, R. S. (1994) The acclimated response of growth, photosynthesis, composition, and carbon balance to temperature in the psychrophilic ice diatom *Nitzschia seriata*. *J. Phycol.*, **30**, 8–16.
- Smith, V. H. and McBride, R. C. (2015) Key ecological challenges in sustainable algal biofuels production. *J. Plankton Res.*, **37**, 671–682.
- Svenning, J. B., Dalheim, L., Eilersten, H. C. and Vasskog, T. (2019) Temperature dependent growth rate, lipid content and fatty acid composition of the marine cold-water diatom *Porosira glacialis*. *Algal Res.*, **37**, 11–16.
- Thomas, D. N. and Dieckmann, G. S. (2002) Antarctic Sea ice-a habitat for extremophiles. *Science*, **295**, 641–644.
- Thomas, M. and Klaus, V. (2004) Photosynthesis and cold acclimation: molecular evidence from a polar diatom. *J. Phycol.*, **40**, 732–741.
- Thomas, D. N. and Dieckmann, G. S. (2002) Antarctic Sea ice-a habitat for extremophiles. *Science*, **295**, 641–644.
- Yang, C., Hua, Q. and Shimizu, K. (2000) Energetics and carbon metabolism during growth of microalgal cells under photoautotrophic, mixotrophic and cyclic light-autotrophic/dark-heterotrophic conditions. *Biochem. Eng. J.*, **6**, 87–102.
- Yang, Q., Xie, P., Shen, H., Xu, J., Wang, P. and Zhang, B. (2012) A novel flushing strategy for diatom bloom prevention in the lower-middle Hanjiang River. *Water Res.*, **46**, 2525–2534.
- Zill, J. C., Kansy, M., Goss, R., Köhler, L., Alia, A., Wilhelm, C. and Matysik, J. (2017) Photo-CIDNP in the reaction center of the diatom *Cyclotella meneghiniana* observed by <sup>13</sup>C MAS NMR. *J. Phys. Chem.*, **231**, 347–367.
- Zhu, B. H., Shi, H. P., Yang, G. P., Lv, N. N., Yang, M. and Pan, K. H. (2015) Silencing UDP-glucose pyrophosphorylase gene in *Phaeodactylum tricornutum* affects carbon allocation. *New Biotechnol.*, **33**, 237–244.
